# Supplementary material for: Suitability of crude glycerol obtained from biodiesel waste for the production of trehalose and propionic acid
Source: Royal Society of Chemistry journal article supplement (doi:10.1039/c1gc15847c), 2011-01-01
Supplement: c1gc15847c.pdf [file c1gc15847c.pdf]

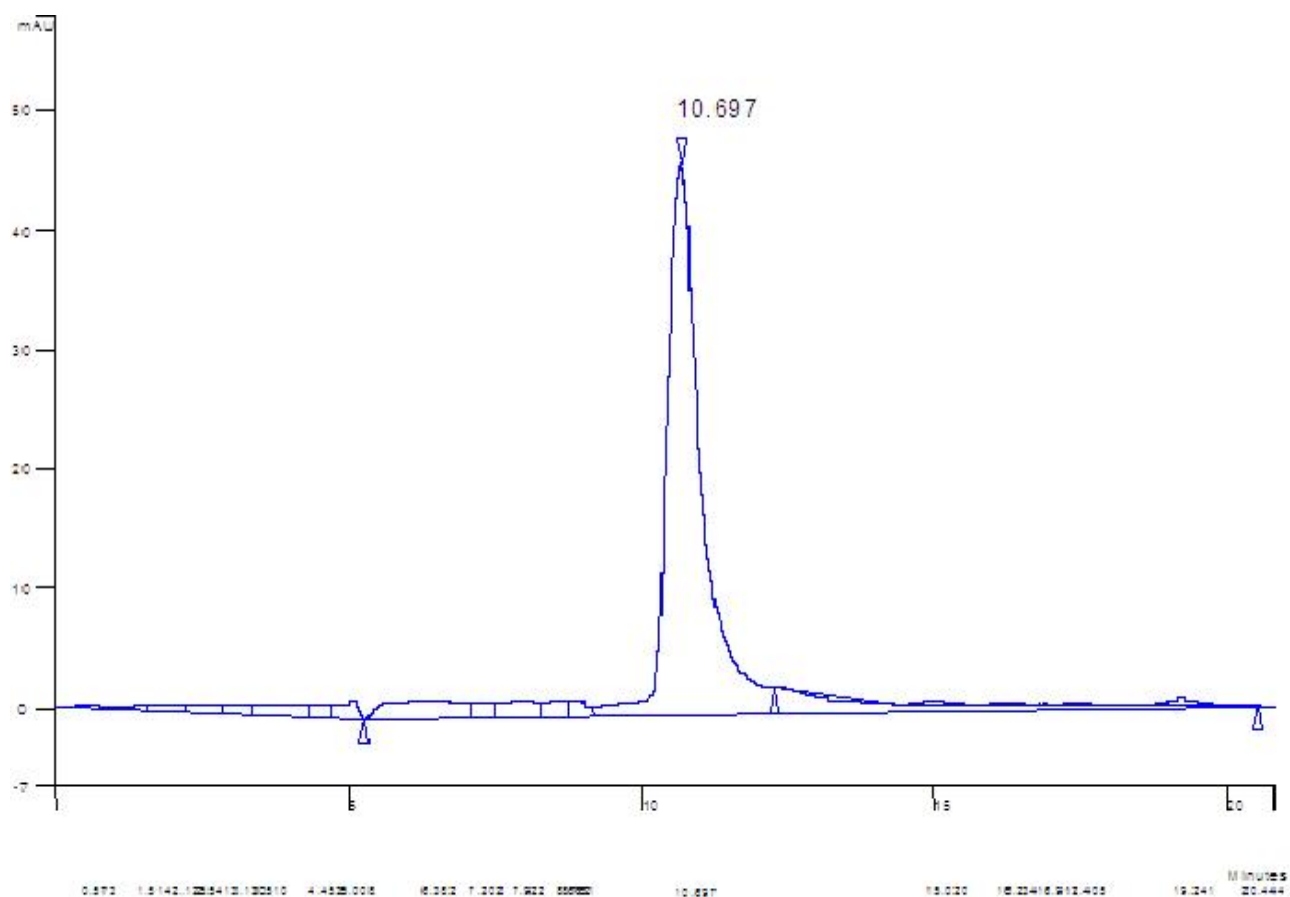

**Supplementary Fig 1a:** HPLC peak of standard sample of lactic acid.

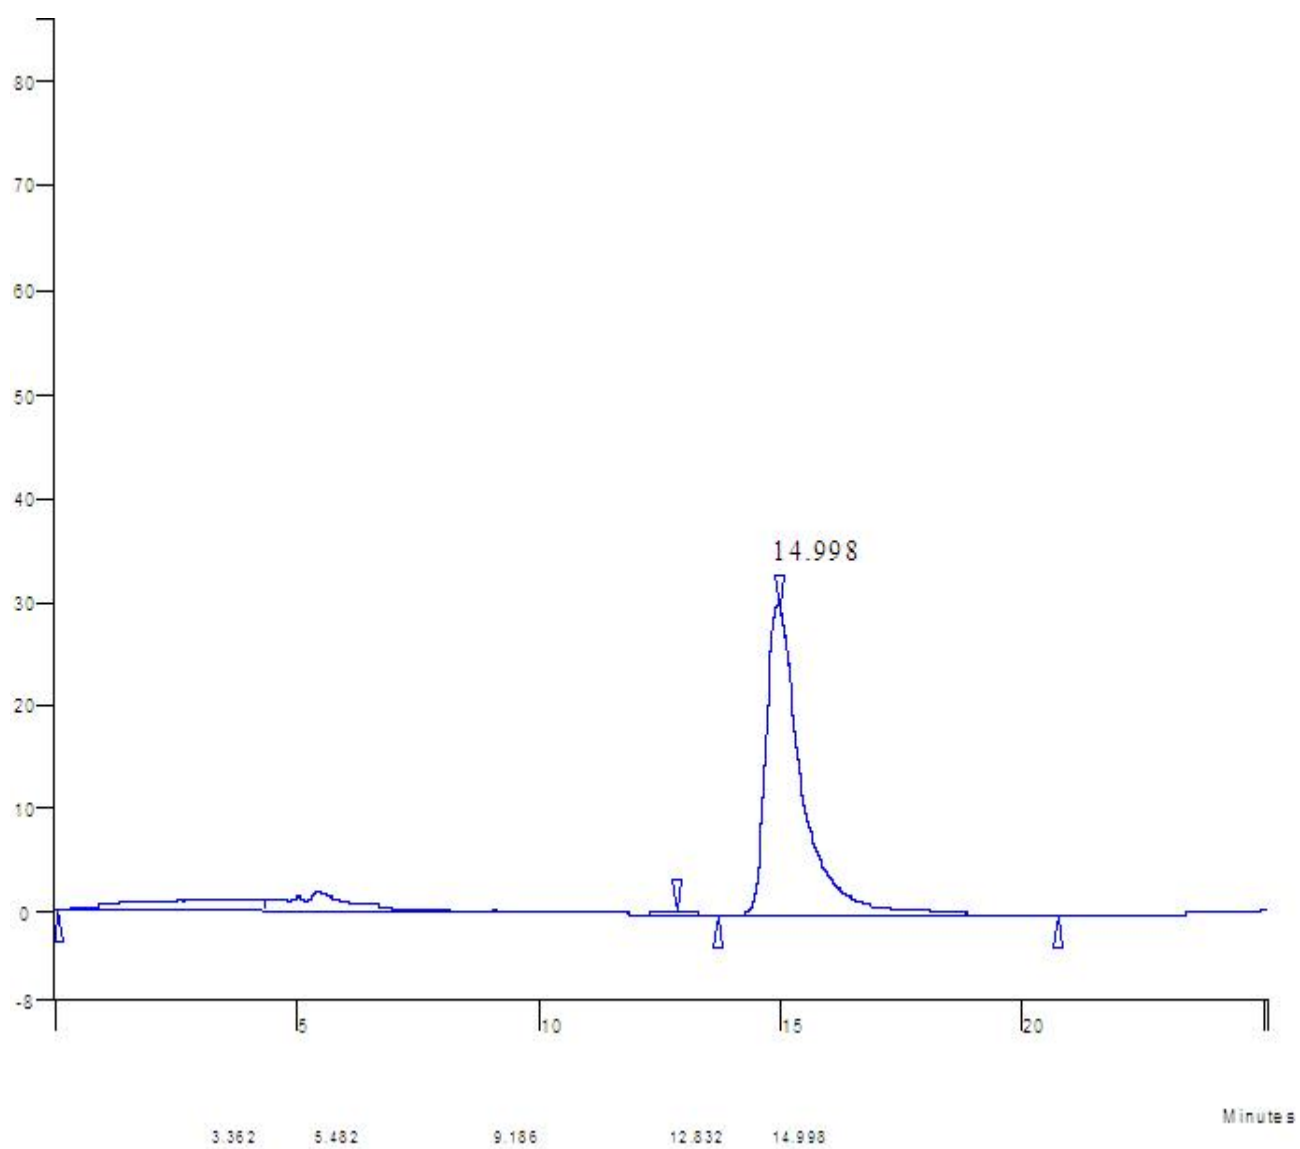

**Supplementary Fig 1b:** HPLC peak of standard sample of propionic acid

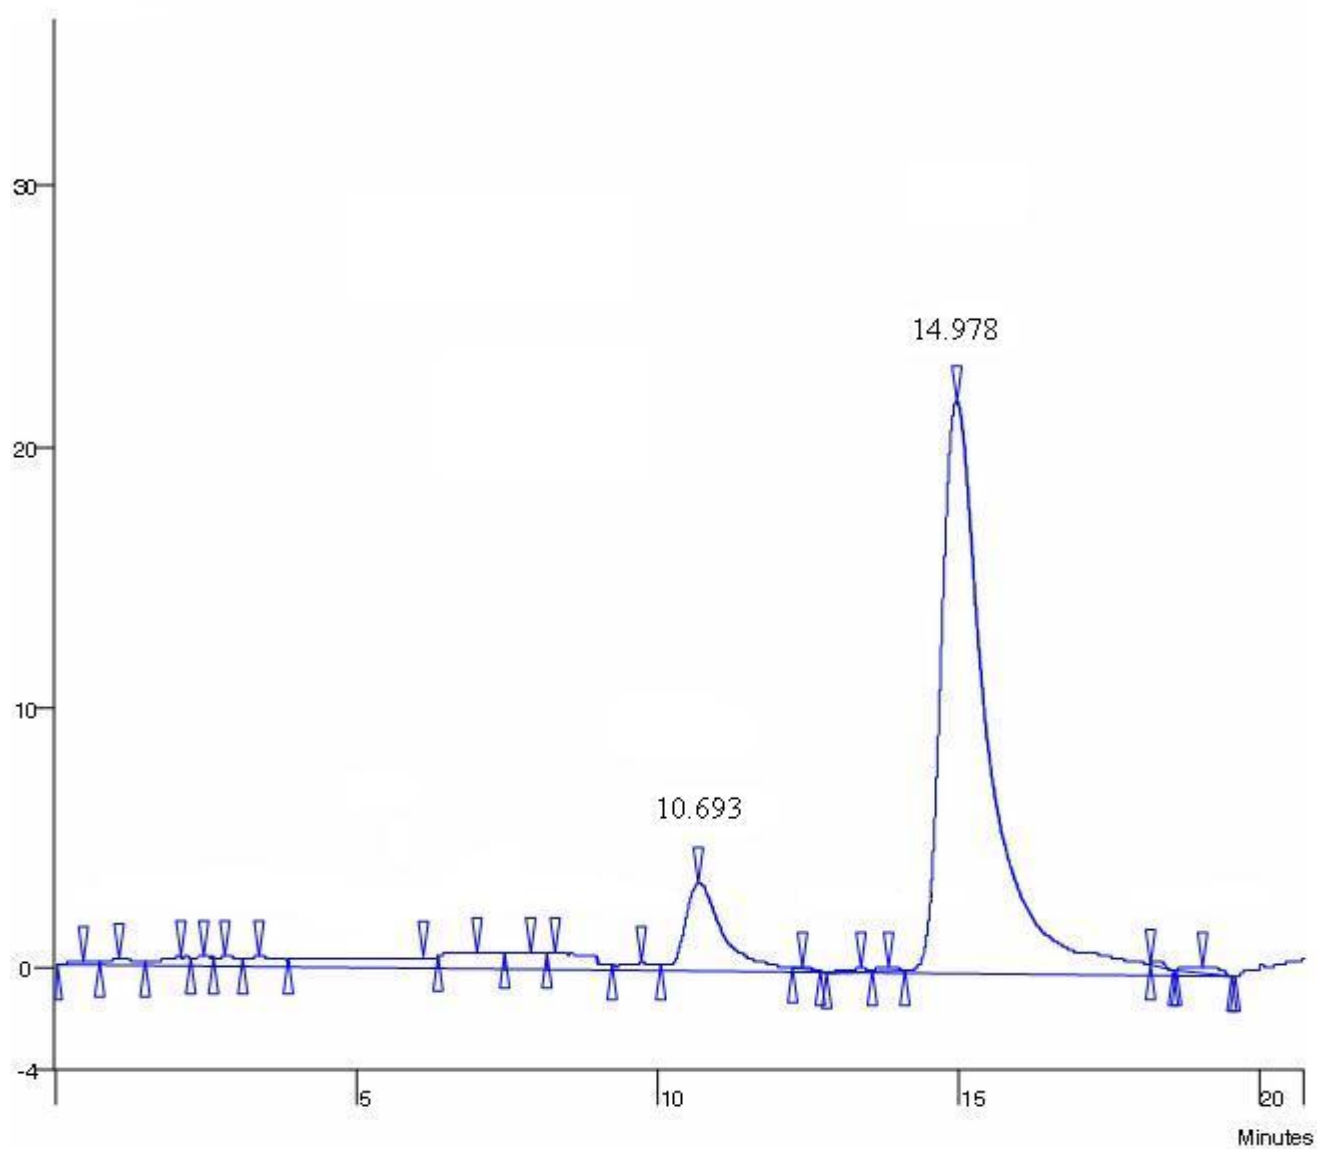

**Supplementary Fig 1c:** HPLC peak of fermentation broth containing propionic acid and lactic acid.

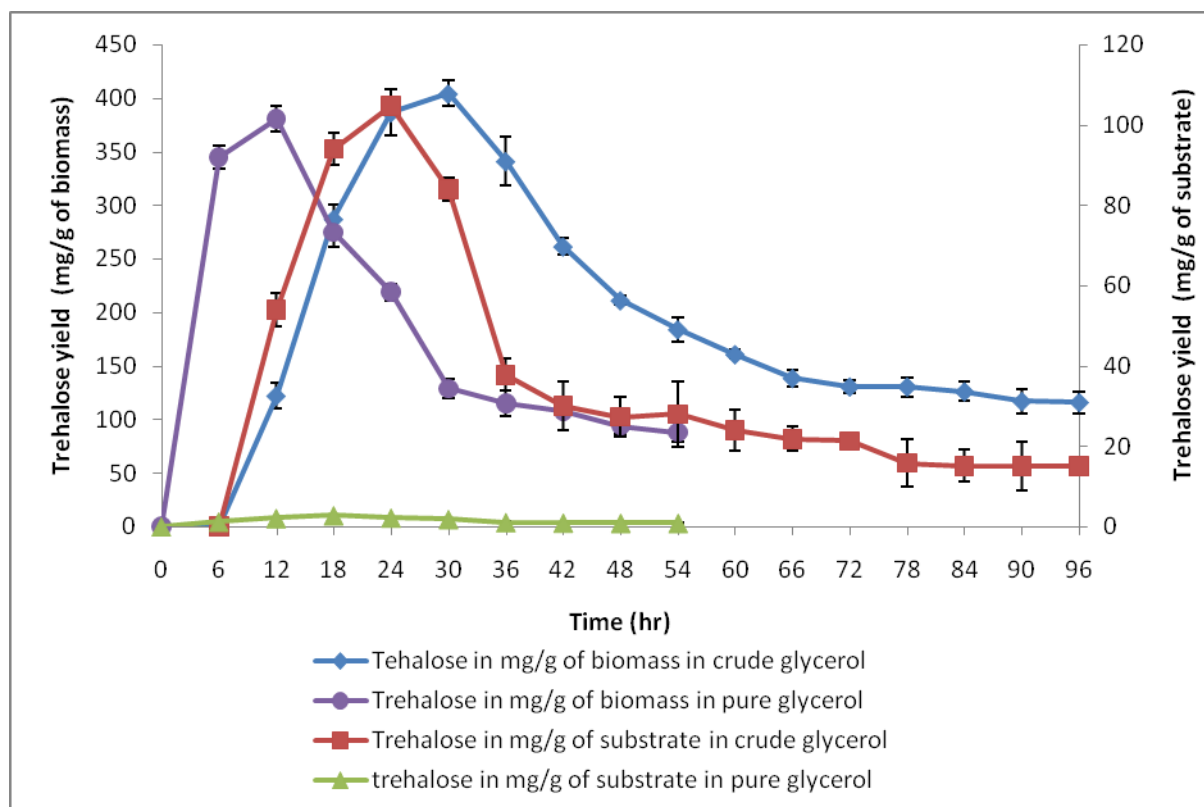

**Supplementary Fig 2:** Comparison of trehalose yields with respect to biomass and substrate consumed with crude and pure glycerol media in static flask conditions

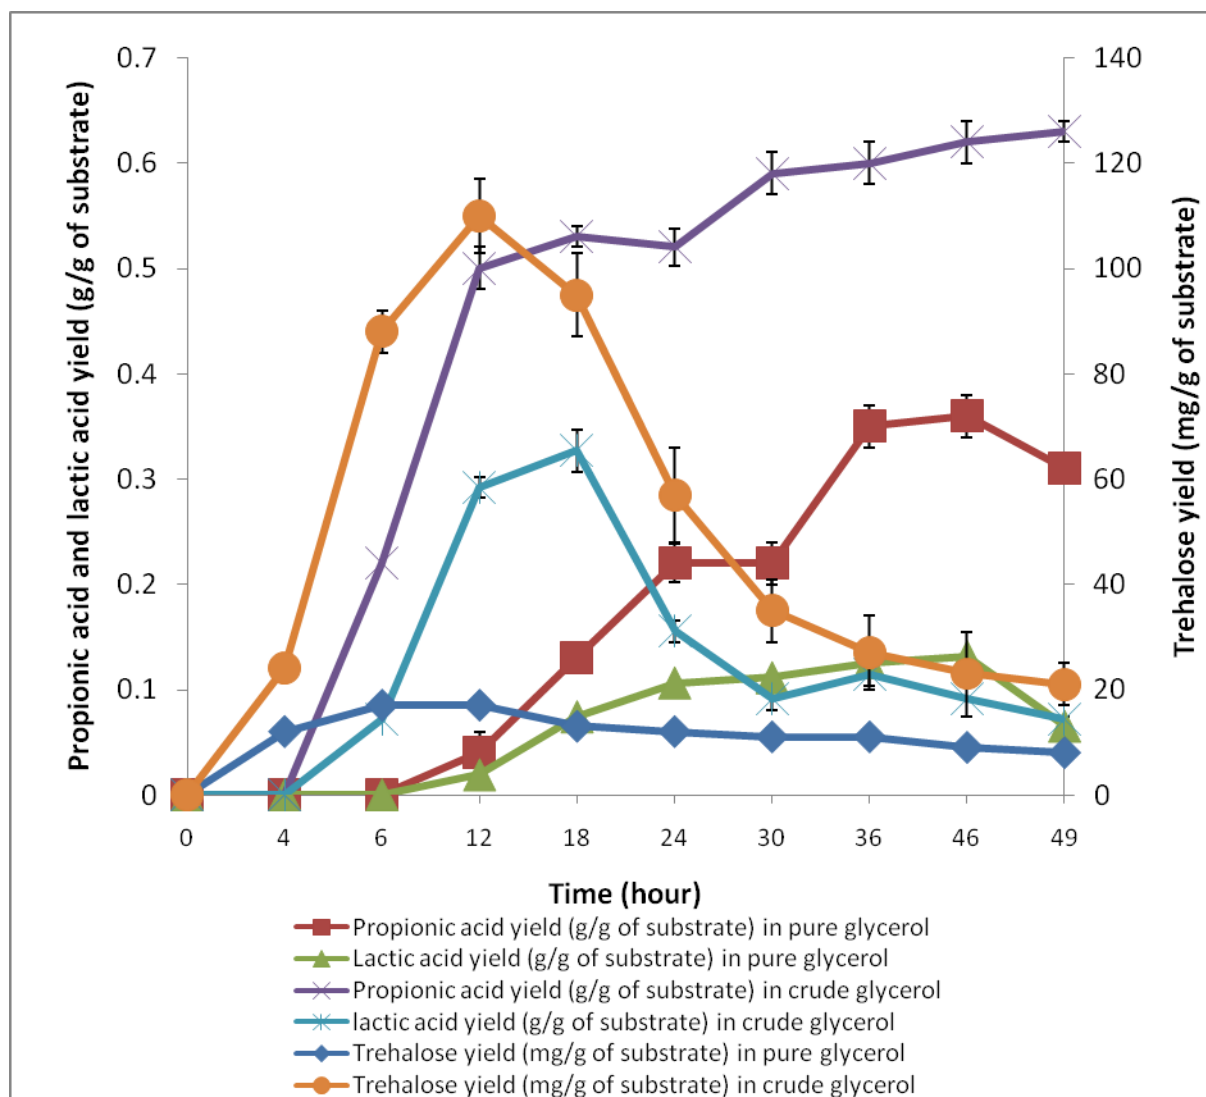

**Supplementary Fig 3:** Comparison of yields of trehalose, propionic acid and lactic acid with pure and crude glycerol media (20 g/l) in batch reactor.

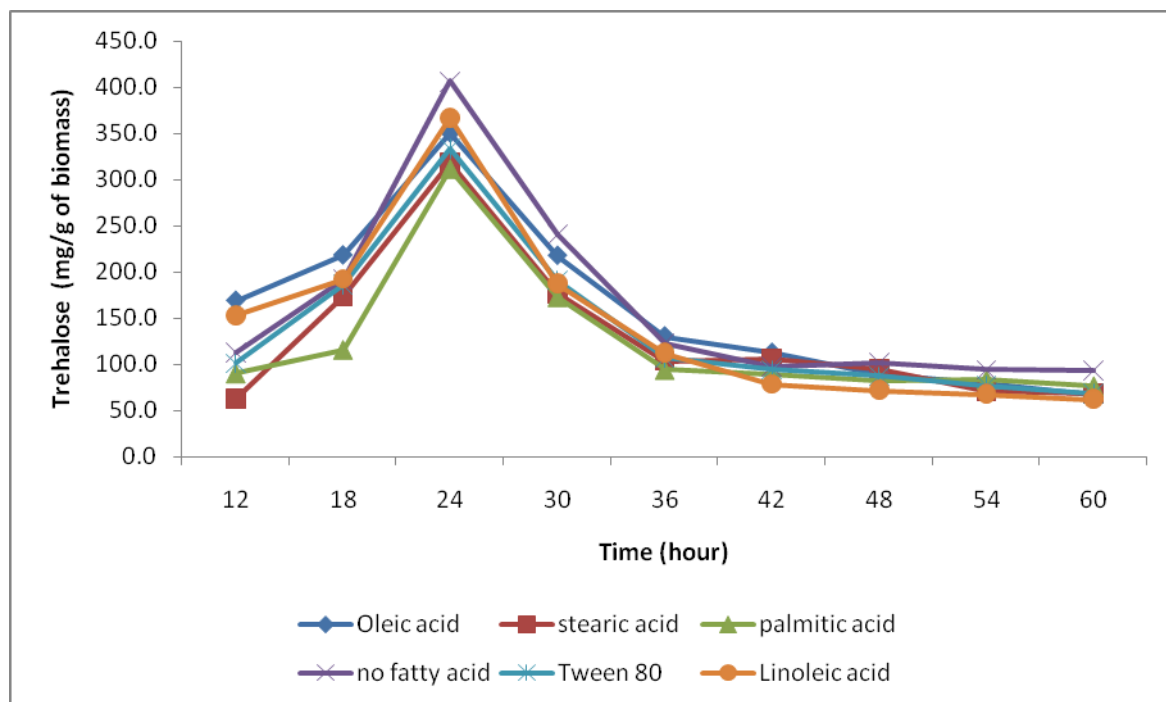

**Supplementary Fig 4a:** Effects of various fatty acids on trehalose yield with respect to biomass

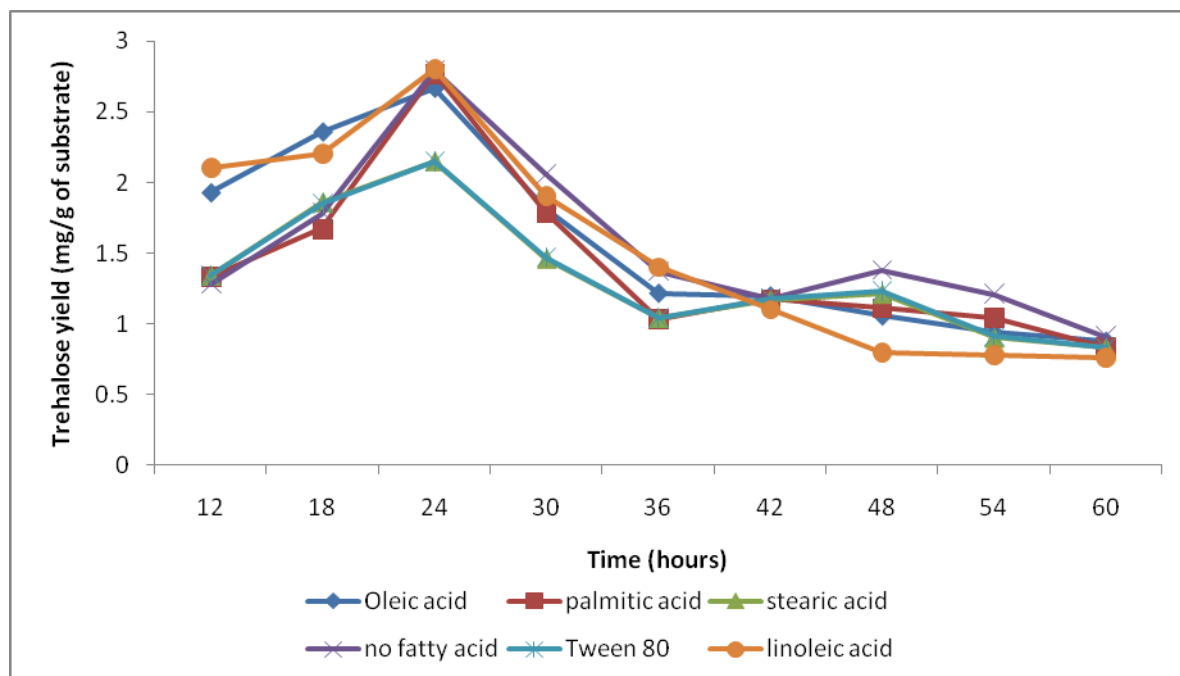

**Supplementary Fig 4b:** Effects of various fatty acids on trehalose yield with respect to substrate consumed

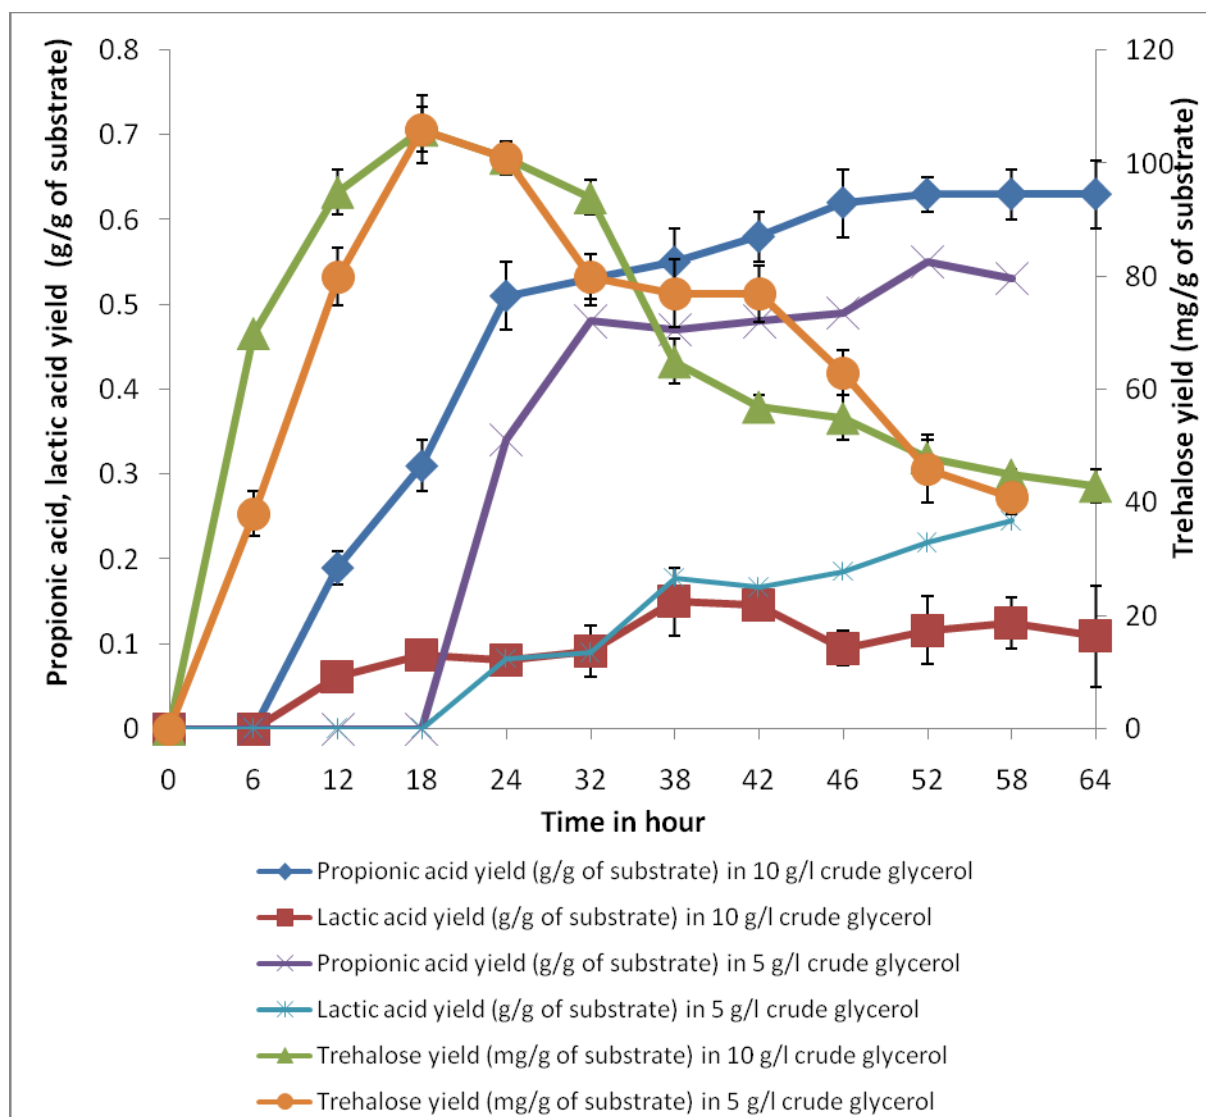

**Supplementary Fig 5:** Comparison of yields of trehalose, propionic acid and lactic acid with 10 and 5 g/l of crude glycerol media.
